# Supplementary material for: Flexible interlocked porous frameworks allow quantitative photoisomerization in a crystalline solid
Source: PubMed Central journal article supplement (PMC5524650; doi:10.1038/s41467-017-00122-5), 2017-07-24
Supplement: 41467_2017_122_MOESM1_ESM.pdf [file 41467_2017_122_MOESM1_ESM.pdf]

File Name: Supplementary Information

Description: Supplementary Figures and Supplementary Table

File Name: Peer Review File

Description:

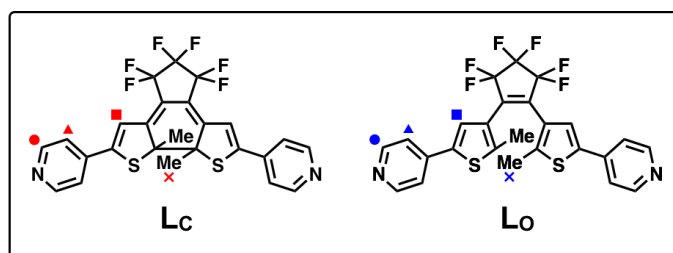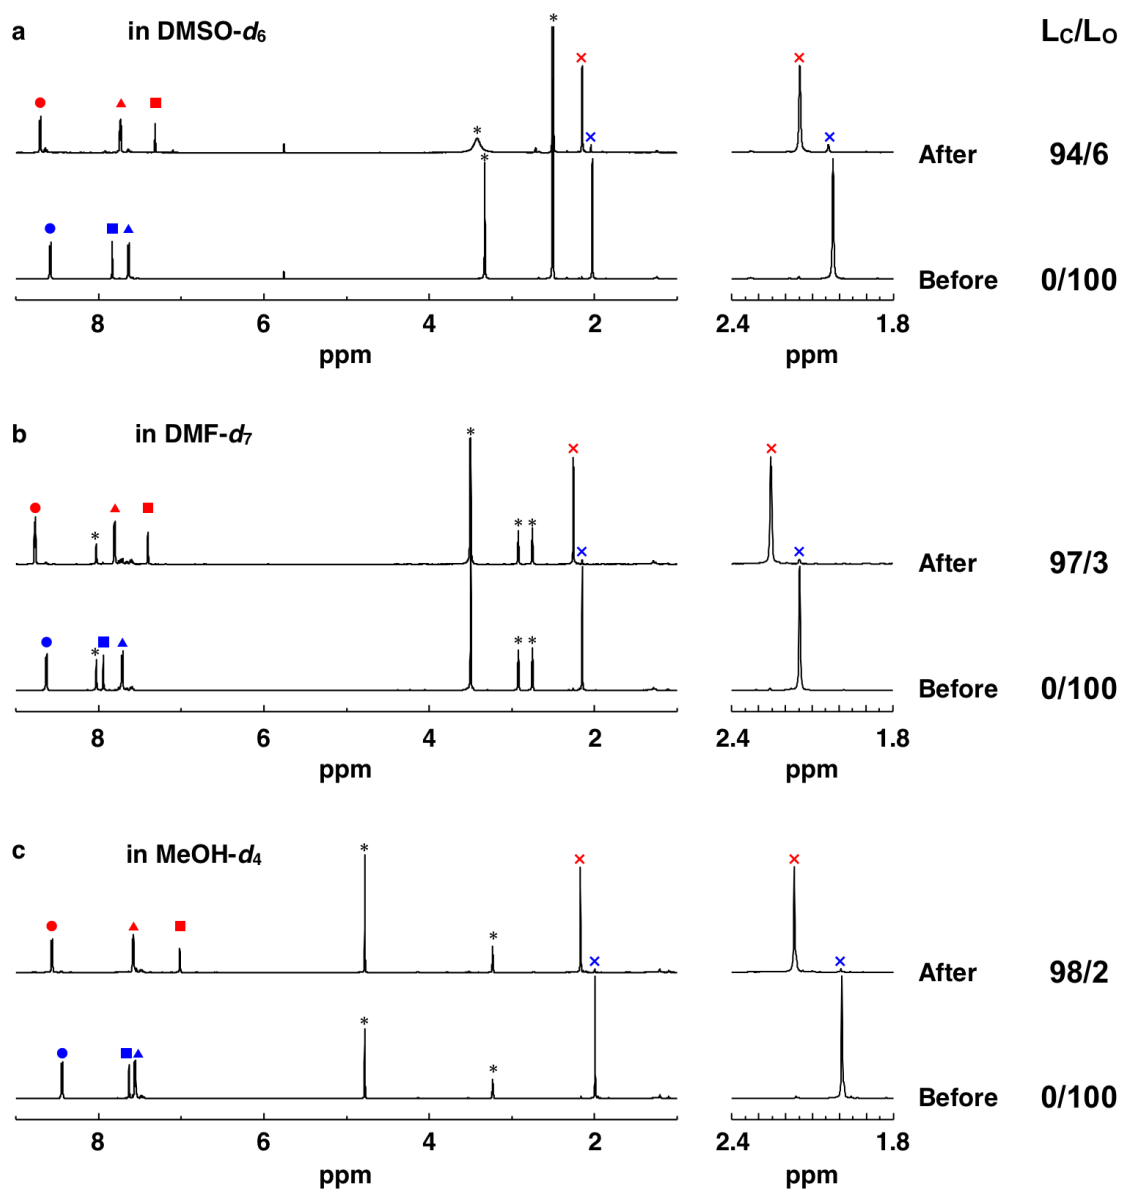

**Supplementary Figure 1. Photochemical conversions from  $L_0$  to  $L_c$  in deuterated solvents.**  $^1\text{H}$  NMR spectra (298 K) of the photochromic ligands before (bottom) and after (top) UV light irradiation in (a) DMSO- $d_6$ , (b) DMF- $d_7$ , and (c) MeOH- $d_4$ . Based on the signals for methyl protons (marked by crosses), the ratios of  $L_c$  to  $L_0$  are estimated to be 94/6, 97/3, and 98/2 in DMSO- $d_6$ , DMF- $d_7$ , and MeOH- $d_4$ , respectively, after 1 h of UV irradiation. The asterisks are the signals of the solvents and water.

**Non-Irradiated PCP 1**

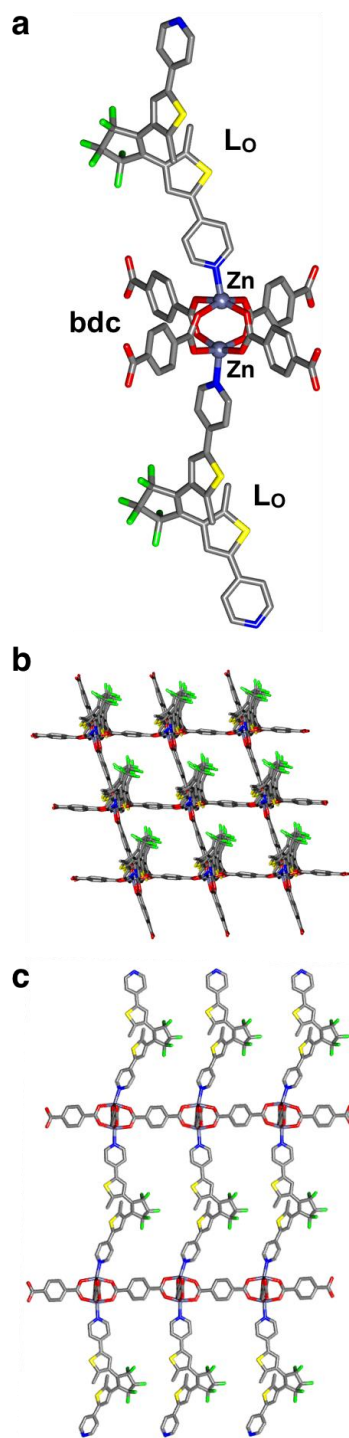

**Guest-Free PCP 1'**

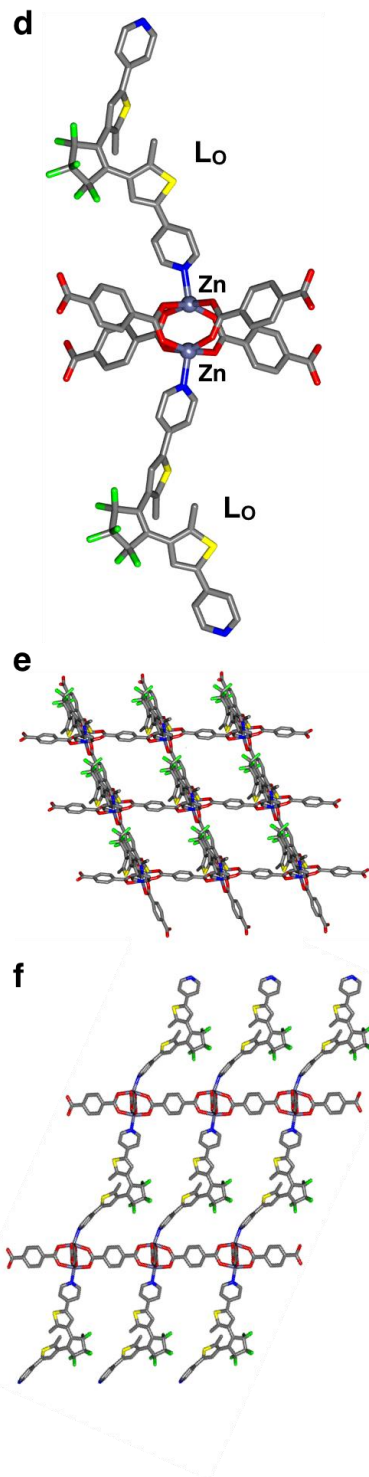

**UV-Irradiated PCP 2**

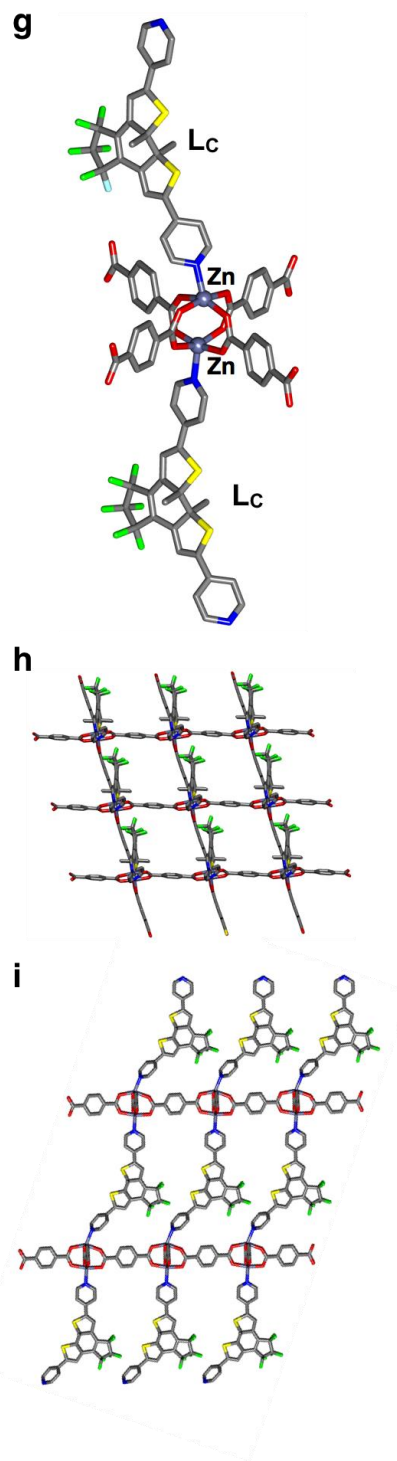

**Supplementary Figure 2. Crystal structure of as-synthesized PCP 1 (a-c), guest-free PCP 1' (d-f), and UV-irradiated PCP 2 (g-i).** Atoms are coloured as follows: Zn, cyan; C, grey; N, blue; O, red; S, yellow; F, green. Hydrogen atoms, DMF and water molecules are omitted for clarity. **a, d, g,** Coordination environment around Zn ions. **b, e, h,** Top views of pillared-layer structures. **c, f, i,** Side views of pillared-layer structures.

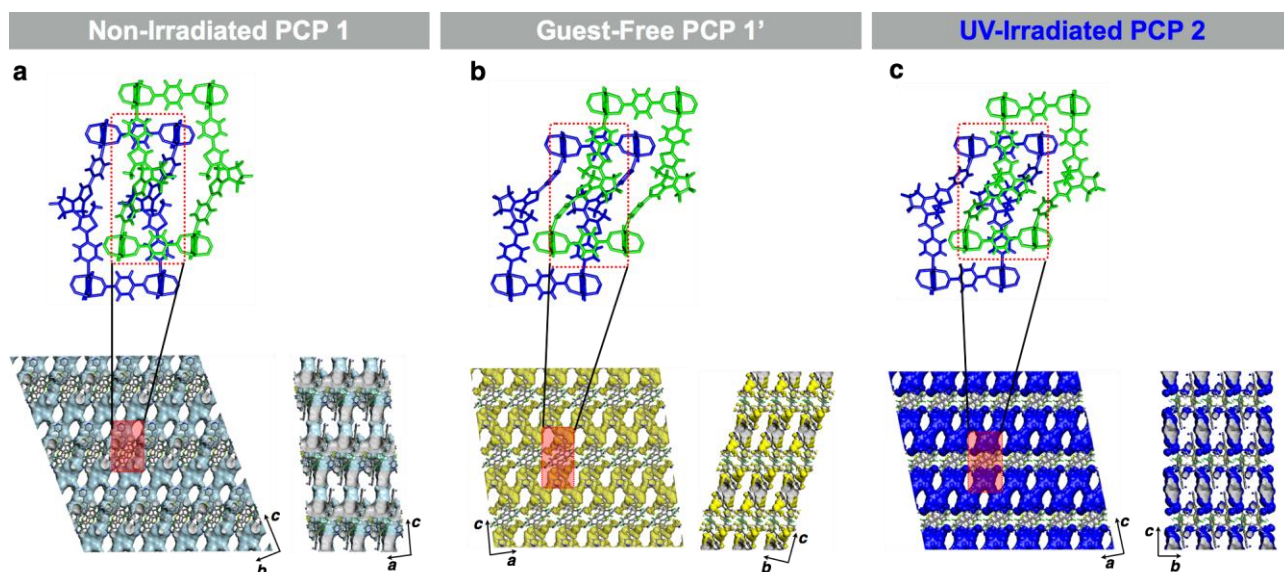

**Supplementary Figure 3. Channel structures of as-synthesized **1** (a), guest-free **1'** (b), and UV-irradiated **2** (c).** The Connolly surfaces (Connolly radius: 1.6 Å) are depicted in pale blue, yellow, and blue in PCPs **1**, **1'**, and **2**, respectively. One of the two-fold interpenetrated frameworks is highlighted in green and the other in blue. In the figures of channels, the layers composed of Zn ions,  $\text{bdc}^{2-}$ , and guest molecules (DMF and water) are omitted for clarity. The channels in PCP **1** are three-dimensionally connected, while the channels in **1'** and **2** are found in one-dimensional zig-zag shapes.

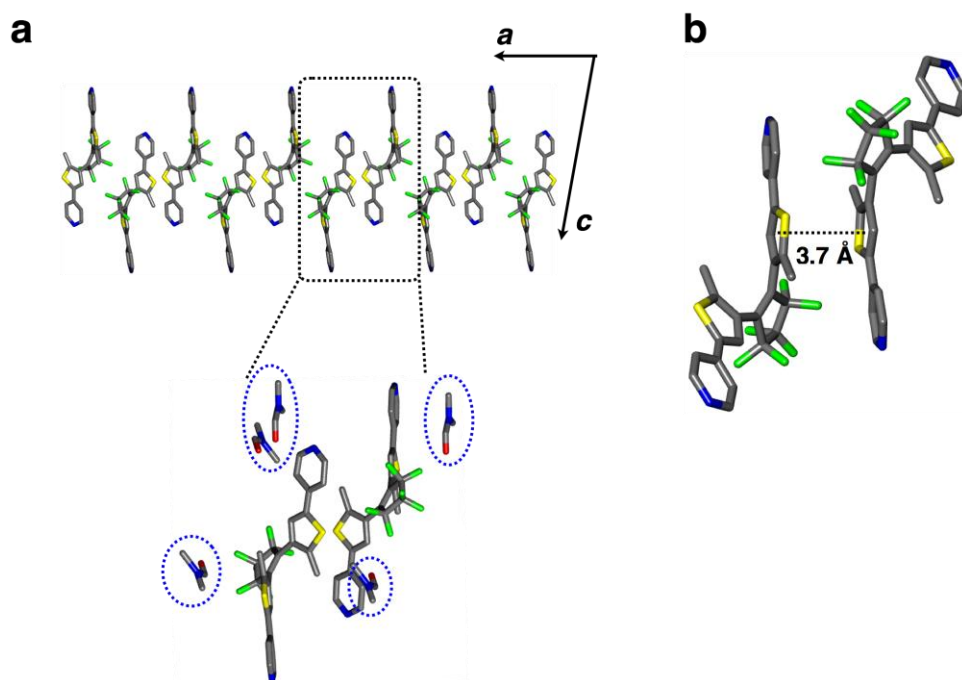

**Supplementary Figure 4. The arrangement of **L**<sub>0</sub> in PCP 1.** C, grey; N, blue; O, red; S, yellow; F, green. Hydrogen atoms are omitted for clarity. **a**, One-dimensional array of **L**<sub>0</sub> along the *a*-axis. **L**<sub>0</sub> molecules are surrounded by DMF molecules marked by blue circles. **b**,  $\pi$  -  $\pi$  interaction was found in a pair of neighbouring **L**<sub>0</sub> molecules.

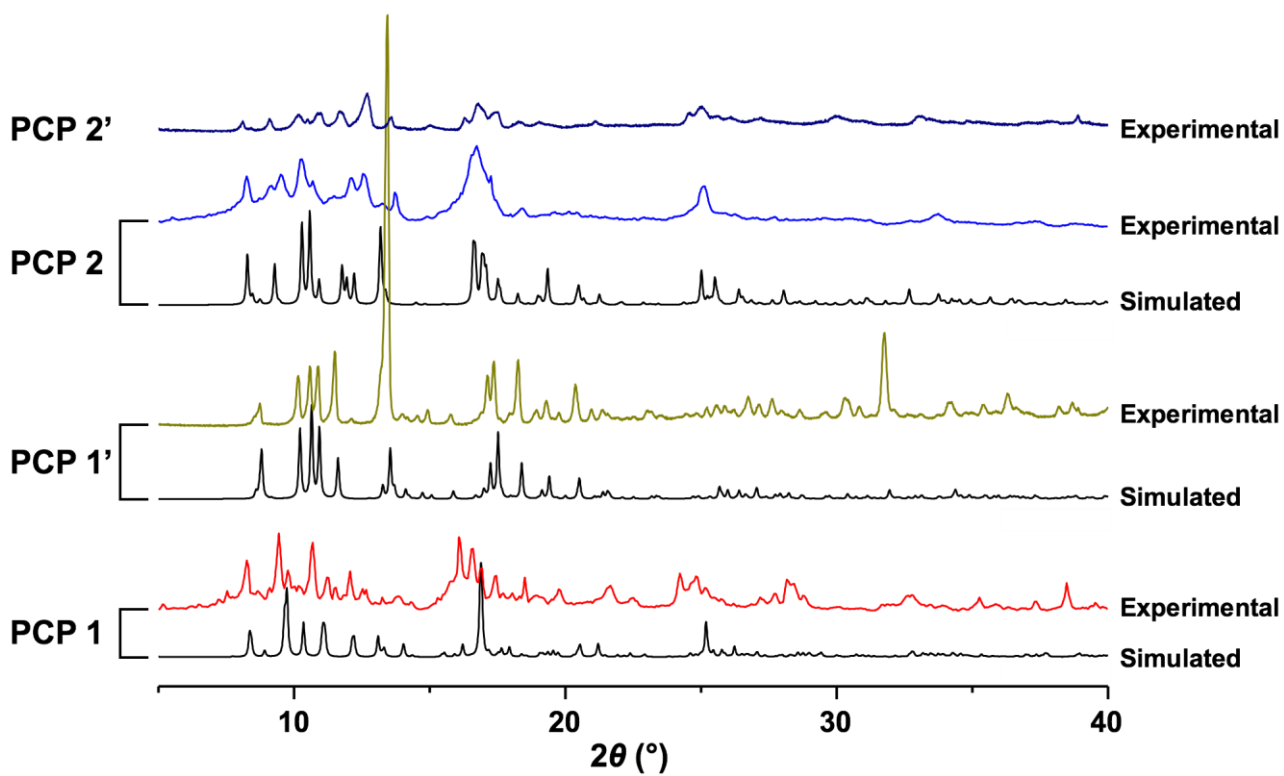

**Supplementary Figure 5.** XRPD patterns for PCPs as-synthesized **1**, guest-free **1'**, UV-irradiated **2**, and UV-irradiated guest-free **2'**. Data were obtained using Cu  $K\alpha$  radiation ( $\lambda = 1.54 \text{ \AA}$ ).

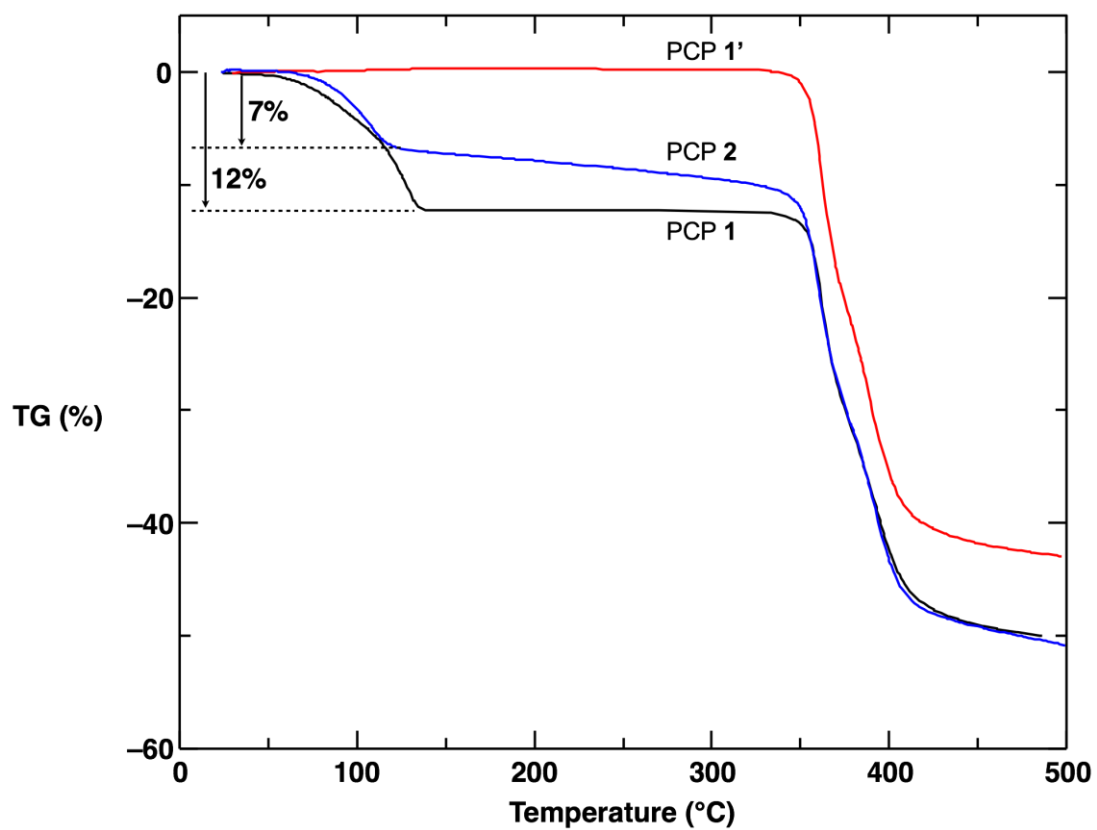

**Supplementary Figure 6.** TG profiles of PCP 1 (black), 1' (red), and 2 (blue). Weight loss was due to the loss of the guest molecules (DMF and water). Calcd. for PCP 1: 13.7%, PCP 2: 6.9%.

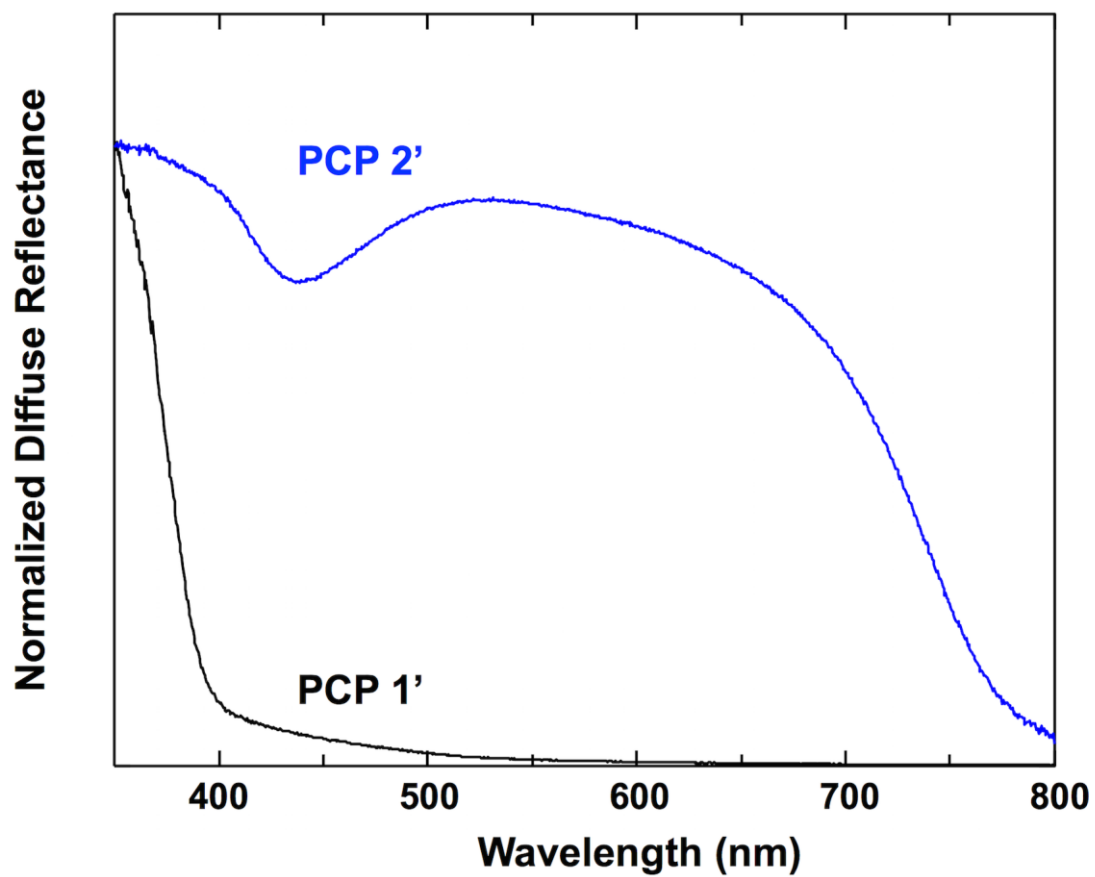

Supplementary Figure 7. Diffuse reflectance spectra of PCP 1' (black) and 2' (blue).



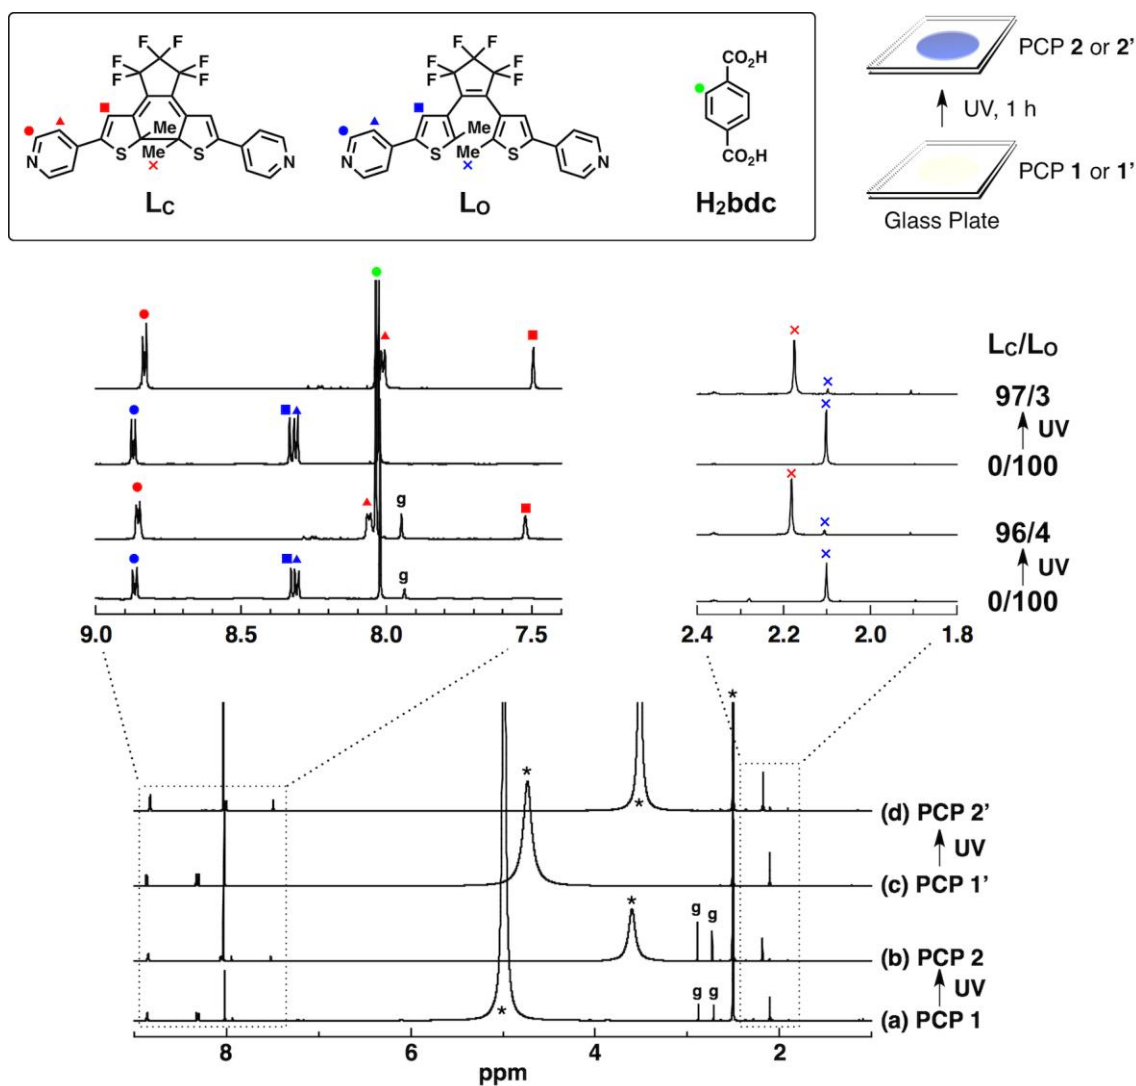

**Supplementary Figure 8. Photochemical conversions from **Lo** to **Lc** in the PCP crystals.** <sup>1</sup>H NMR spectra of (a) as-synthesized **1**, (b) UV-irradiated **2**, (c) guest-free **1'** and (d) UV-irradiated guest-free **2'** digested in DMSO-*d*<sub>6</sub>/aq. HCl. The ratios of **Lc/Lo** in PCP **2** and **2'** are estimated to be 96/4 and 97/3, respectively. The signals marked with an asterisk are assignable to those of the solvents and water. The signals labelled with “g” are the protons of the DMF molecules included as a guest. A schematic illustration for the preparation of the samples for <sup>1</sup>H NMR spectroscopy is shown on the top.

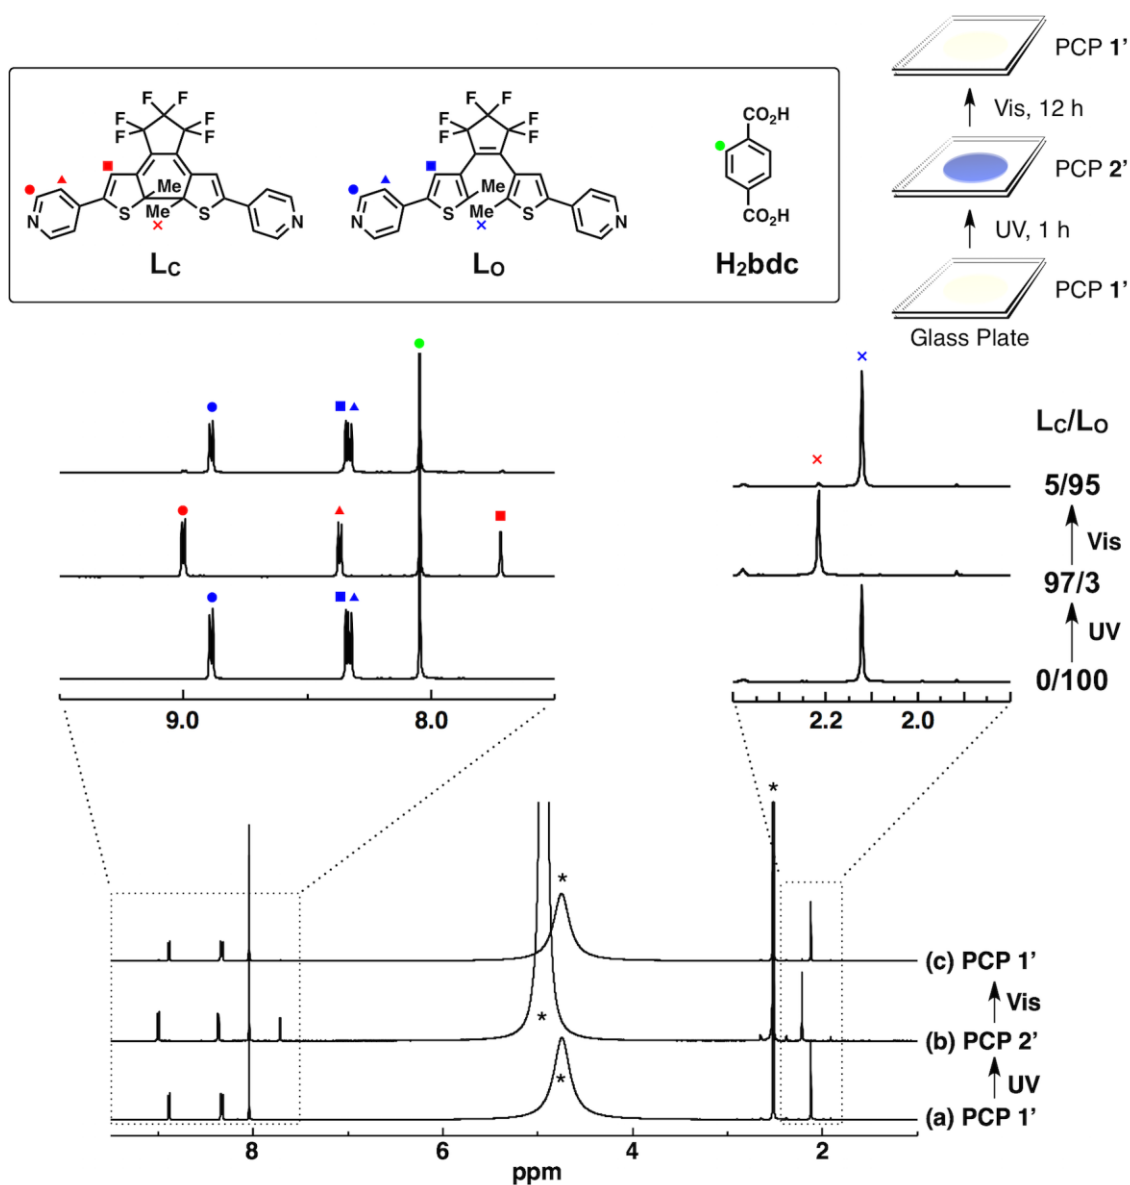

**Supplementary Figure 9. Reversible photochemical conversions between **Lo** and **Lc** in the PCP crystals.** <sup>1</sup>H NMR spectra of guest-free **1'** (a) before and (b) after irradiation with UV (**PCP 2'**), and (c) after irradiation with UV and visible light (recovered **PCP 1'**). The solid substances were digested in DMSO-*d*<sub>6</sub>/aq. HCl for <sup>1</sup>H NMR spectroscopy. The ratios of **Lc/Lo** in **PCP 2'** and recovered **PCP 1'** are estimated to be 97/3 and 5/95, respectively. The signals marked with an asterisk are assignable to those of the solvents and water. A schematic illustration for the preparation of the samples for <sup>1</sup>H NMR spectroscopy is shown on the top.

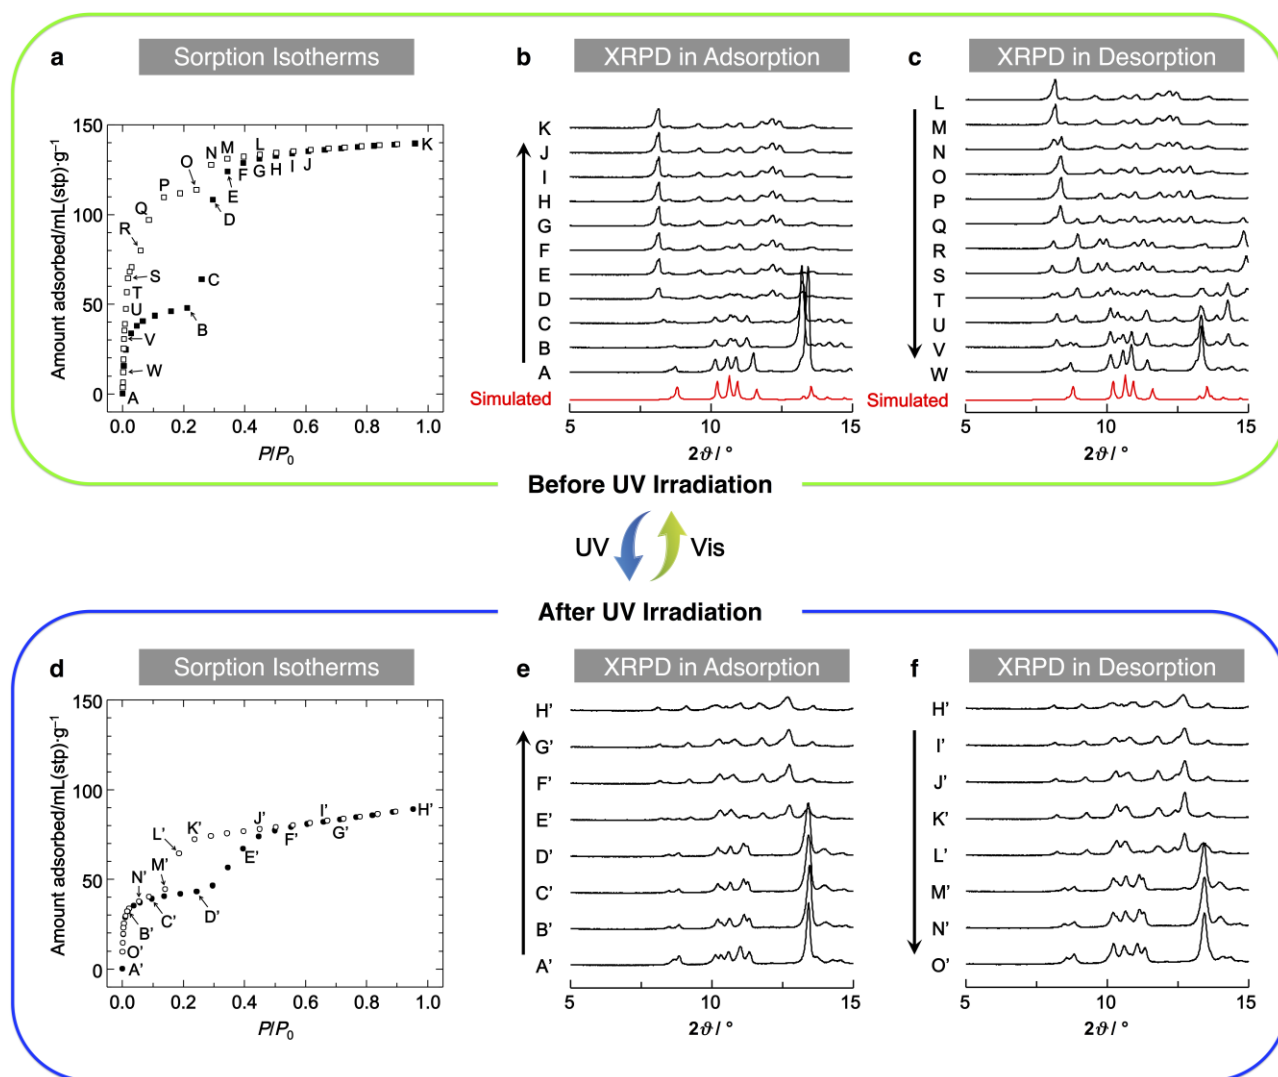

**Supplementary Figure 10. Coincident XRPD and CO<sub>2</sub> sorption measurements of PCPs 1' (a-c) and 2' (d-f) at 195 K.** **a**, CO<sub>2</sub> adsorption (filled) and desorption (open) of non-irradiated PCP 1'. **b**, XRPD patterns measured for the adsorption branch in **a**. **c**, XRPD patterns measured for the desorption branch in **a**. **d**, CO<sub>2</sub> adsorption (filled) and desorption (open) of UV-irradiated PCP 2'. **e**, XRPD patterns measured for the adsorption branch in **d**. **f**, XRPD patterns measured for the desorption branch in **d**. STP means standard temperature and pressure.

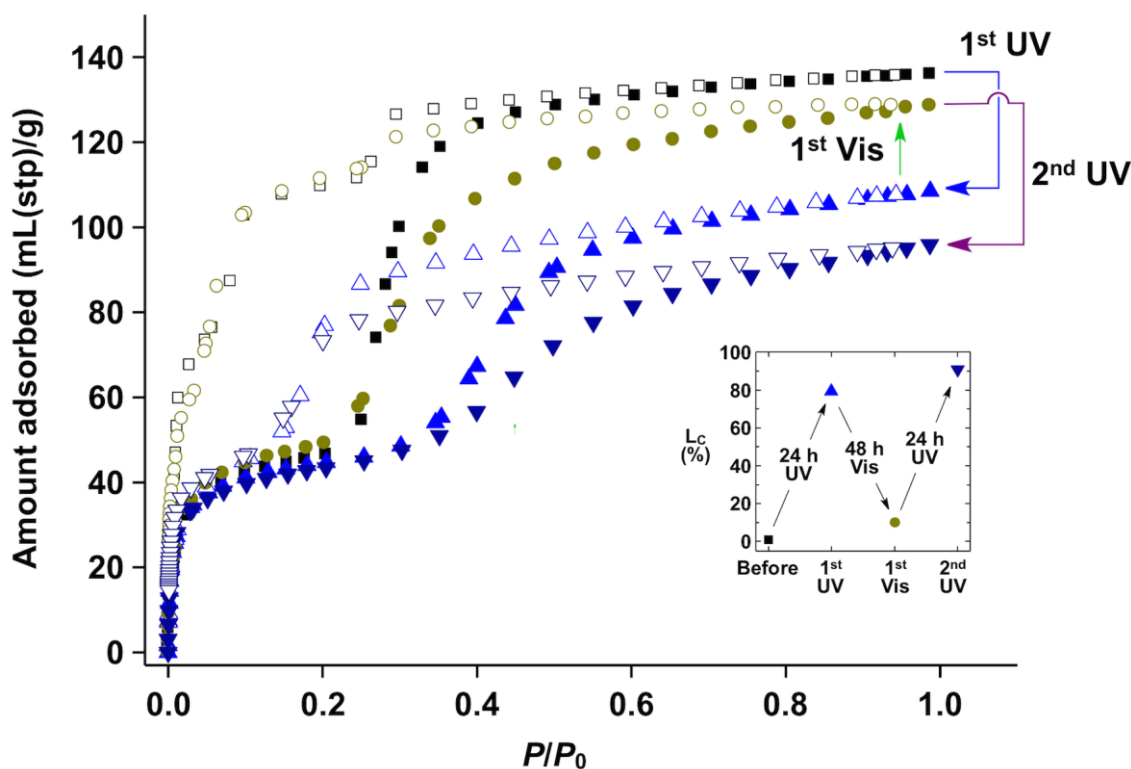

**Supplementary Figure 11. Photochemically reversible control of the CO<sub>2</sub> sorption behaviour on PCP 1’.** The CO<sub>2</sub> amounts adsorbed on the PCP at  $P/P_0 = 0.95$  were found to be 136 (■, initial PCP 1’), 108 (▲, PCP 1’ after 1<sup>st</sup> UV irradiation), 129 (●, PCP 1’ after 1<sup>st</sup> UV and 1<sup>st</sup> vis light irradiation), and 96 ml(stp)·g<sup>-1</sup> (▼, PCP 1’ after 1<sup>st</sup> UV, 1<sup>st</sup> vis, and 2<sup>nd</sup> UV irradiation). By taking advantage of the thermal stability of  $L_C$ , we successfully obtained the profile of  $L_C$  contents by digesting the photoirradiated samples with DCI in DMSO-*d*<sub>6</sub>. The inset shows  $L_C$  contents in the solid substances used for the CO<sub>2</sub> sorption experiments. The result indicates that the photomodulation of CO<sub>2</sub> sorption is reversibly achieved by irradiation with UV and visible light.

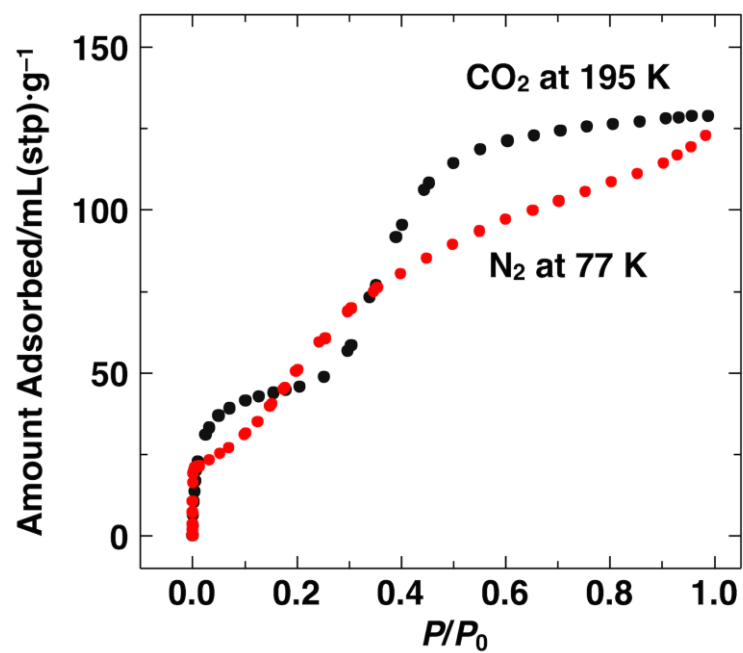

Supplementary Figure 12. Gas sorption isotherms of PCP 1' for CO<sub>2</sub> (195 K) and N<sub>2</sub> (77 K).

**Supplementary Table 1.** X-ray crystallographic data for PCP **1**, **1'**, and **2**.

| Parameters                                         | PCP <b>1</b>       | PCP <b>1'</b>     | PCP <b>2</b>      |
|----------------------------------------------------|--------------------|-------------------|-------------------|
| Crystal system                                     | Triclinic          | Triclinic         | Triclinic         |
| Space group                                        | P-1                | P-1               | P-1               |
| <i>a</i> , Å                                       | 10.920(4)          | 10.832(3)         | 10.983(10)        |
| <i>b</i> , Å                                       | 21.693(6)          | 10.893(2)         | 11.014(12)        |
| <i>c</i> , Å                                       | 23.699(6)          | 20.388(5)         | 20.55(2)          |
| $\alpha$ , deg                                     | 67.91(2)           | 104.162(18)       | 88.39(4)          |
| $\beta$ , deg                                      | 79.76(2)           | 92.972(19)        | 78.45(4)          |
| $\gamma$ , deg                                     | 76.563(18)         | 106.805(17)       | 75.71(5)          |
| <i>V</i> , Å <sup>3</sup>                          | 5034(3)            | 2213.3(9)         | 2360(4)           |
| Accessible volume, Å <sup>3</sup>                  | 1528.4<br>(30.4 %) | 324.5<br>(14.7 %) | 498.4<br>(21.1 %) |
| <i>Z</i>                                           | 2                  | 2                 | 2                 |
| <i>T</i> , K                                       | 103                | 103               | 100               |
| <i>D</i> <sub>calcd</sub> , g/cm <sup>3</sup>      | 1.499              | 1.473             | 1.484             |
| GOF on <i>F</i> <sup>2</sup>                       | 1.266              | 1.303             | 1.054             |
| <i>R</i> <sub>1</sub> [ <i>I</i> > 2σ( <i>I</i> )] | 0.1196             | 0.1026            | 0.1533            |
| <i>R</i> <sub>2</sub> [ <i>I</i> > 2σ( <i>I</i> )] | 0.3223             | 0.3056            | 0.4284            |
| Data Completeness                                  | 0.959              | 0.933             | 0.931             |
